# Supplementary material for: Cystatin B is essential for proliferation and interneuron migration in individuals with EPM1 epilepsy
Source: PubMed Central journal article supplement (PMC7278547; doi:10.15252/emmm.201911419), 2020-05-07
Supplement: EMMM-12-e11419-s001.pdf [file EMMM-12-e11419-s001.pdf]

## Appendix

### **Cystatin B is essential for proliferation and interneuron migration in individuals with EPM1 epilepsy**

Francesco Di Matteo<sup>1,2,7</sup>, Fabrizia Pipicelli<sup>1,2,7</sup>, Christina Kyrousi<sup>1</sup>, Isabella Tovecci<sup>1,3</sup>, Eduardo Penna<sup>3</sup>, Marianna Crispino<sup>3</sup>, Angela Chambery<sup>4</sup>, Rosita Russo<sup>4</sup>, Ane Cristina Ayo-Martin<sup>1,2</sup>, Martina Giordano<sup>1</sup>, Anke Hoffmann<sup>1</sup>, Emilio Ciusani<sup>5</sup>, Laura Canafoglia<sup>5</sup>, Magdalena Götz<sup>6</sup>, Rossella Di Giaimo<sup>1,3,\*</sup> and Silvia Cappello<sup>1,\*</sup>.

#### **Table Of Content:**

Appendix Table S1 (exact p-values for each figures)

### Appendix table S1

Content: Exact p-values for each panel in the figures.

#### Figure 1.

A.

|          |          |
|----------|----------|
| 16 vs 23 | P=0.0232 |
| 23 vs 50 | P=0.0026 |

C.

|        |          |
|--------|----------|
| PAX6   | P=0.0062 |
| NEUN   | P=0.0213 |
| NESTIN | P=0.0327 |

#### Figure2.

B.

|              |          |
|--------------|----------|
| CTRL vs CSTB | P=0.0286 |
|--------------|----------|

D.

|              |          |
|--------------|----------|
| CTRL vs Cstb | P=0.0286 |
|--------------|----------|

E.

|              |          |
|--------------|----------|
| CTRL vs Cstb | P=0.0286 |
|--------------|----------|

H.

|      |          |
|------|----------|
| Bin3 | P=0.0286 |
|------|----------|

I.

|      |          |
|------|----------|
| Bin1 | P=0.0221 |
| Bin3 | P=0.0012 |

J.

|      |          |
|------|----------|
| Bin3 | P=0.0159 |
| Bin4 | P=0.0159 |

K.

|      |          |
|------|----------|
| Bin3 | P=0.0200 |
|------|----------|

#### Figure 3.

E.

|      |          |
|------|----------|
| Bin3 | P=0.0286 |
|------|----------|

G.

|      |          |
|------|----------|
| Bin3 | P=0.0286 |
|------|----------|

**Figure 4.**

B.

|      |          |
|------|----------|
| Bin2 | P=0.0286 |
| Bin4 | P=0.0286 |
| Bin5 | P=0.0286 |

D.

|            |          |
|------------|----------|
| CTRL vs KD | P=0.0286 |
|------------|----------|

F.

|              |          |
|--------------|----------|
| CTRL vs R68X | P<0.0001 |
| CTRL vs CSTB | P=0.0008 |
| R68X vs CSTB | P=0.0003 |

G.

|              |          |
|--------------|----------|
| CTRL vs R68X | P=0.0265 |
|--------------|----------|

I.

|      |          |
|------|----------|
| Bin1 | P=0.0286 |
| Bin2 | P=0.0286 |
| Bin3 | P=0.0286 |

J.

|      |          |
|------|----------|
| Bin1 | P=0.0167 |
| Bin2 | P=0.0167 |
| Bin3 | P=0.0167 |

K.

|              |          |
|--------------|----------|
| R68X vs CSTB | P=0.0061 |
|--------------|----------|

M.

|              |          |
|--------------|----------|
| R68X vs Cstb | P=0.0074 |
|--------------|----------|

O.

|              |          |
|--------------|----------|
| R68X vs CSTB | P=0.0114 |
|--------------|----------|

**Figure 5.**

A.

|    |               |          |
|----|---------------|----------|
| d4 | f-CTRL vs UL1 | P<0.001  |
| d4 | f-CTRL vs UL4 | P<0.001  |
| d4 | b-CTRL vs UL1 | P<0.001  |
| d4 | b-CTRL vs UL4 | P=0.0479 |
| d7 | f-CTRL vs UL1 | P<0.001  |
| d7 | f-CTRL vs UL4 | P<0.001  |
| d7 | b-CTRL vs UL1 | P<0.001  |
| d7 | b-CTRL vs UL1 | P<0.001  |
| d9 | f-CTRL vs UL1 | P<0.001  |
| d9 | f-CTRL vs UL4 | P<0.001  |
| d9 | b-CTRL vs UL1 | P<0.001  |

|     |               |         |
|-----|---------------|---------|
| d9  | b-CTRL vs UL1 | P<0.001 |
| d11 | f-CTRL vs UL1 | P<0.001 |
| d11 | f-CTRL vs UL4 | P<0.001 |
| d11 | b-CTRL vs UL1 | P<0.001 |
| d11 | b-CTRL vs UL1 | P<0.001 |

C.

|             |          |
|-------------|----------|
| CTRL vs UL1 | P=0.0002 |
|-------------|----------|

D.

|             |          |
|-------------|----------|
| CTRL vs UL1 | P=0.0005 |
|-------------|----------|

F.

|             |          |
|-------------|----------|
| CTRL vs UL1 | P=0.0001 |
| CTRL vs UL4 | P=0.0001 |

G.

|             |          |
|-------------|----------|
| CTRL vs UL1 | P=0.0005 |
| CTRL vs UL4 | P=0.0005 |

H.

|                                   |          |
|-----------------------------------|----------|
| CTRL-CTRLmedium vs CTRL-UL4medium | P=0.0237 |
| UL4-UL4medium vs UL4-CTRLmedium   | P=0.0286 |
| CTRL-CTRLmedium vs UL4-UL4medium  | P=0.0286 |

**Figure 6.**

B.

|             |          |
|-------------|----------|
| CTRL vs UL1 | P<0.0001 |
| CTRL vs UL4 | P<0.0001 |

D.

|             |          |
|-------------|----------|
| CTRL vs UL1 | P<0.0001 |
| CTRL vs UL4 | P<0.0001 |

E.

|             |          |
|-------------|----------|
| CTRL vs UL1 | P=0.0286 |
| CTRL vs UL4 | P=0.0286 |

H.

|                             |          |
|-----------------------------|----------|
| Dorsal f-CTRL vs dorsal UL1 | P=0.0426 |
|-----------------------------|----------|

**Figure EV2.**

K.

|              |          |
|--------------|----------|
| CTRL vs Cstb | P=0.0125 |
|--------------|----------|

**Figure EV3.**

M.

|              |          |
|--------------|----------|
| Cstb vs R68X | P=0.0003 |
| R68X vs KD   | P=0.0048 |

**Figure EV4.**

B.

|               |          |
|---------------|----------|
| f-CTRL vs UL1 | P=0.0065 |
| f-CTRL vs UL4 | P=0.0013 |
| b-CTRL vs UL1 | P=0.0018 |
| b-CTRL vs UL4 | P=0.0018 |

E.

|             |          |
|-------------|----------|
| CTRL vs UL1 | P=0.0045 |
| CLTR vs UL4 | P=0.0022 |

F.

|             |          |
|-------------|----------|
| CTRL vs UL1 | P=0.0010 |
| CLTR vs UL4 | P=0.0006 |

I.

|                                   |          |
|-----------------------------------|----------|
| CTRL-CTRLmedium vs CTRL-UL4medium | P=0.0258 |
| CTRL-CTRLmedium vs UL4-UL4medium  | P=0.0064 |
| CTRL-CTRLmedium vs UL4-CTRLmedium | P=0.0146 |

**Figure EV5.**

C.

|             |          |
|-------------|----------|
| CTRL vs UL1 | P=0.0022 |
| CTRL vs UL4 | P=0.0022 |

D.

|             |          |
|-------------|----------|
| CTRL vs UL1 | P=0.0014 |
| CTRL vs UL4 | P=0.0014 |
