# Supplementary material for: Cystatin B is essential for proliferation and interneuron migration in individuals with EPM1 epilepsy
Source: PubMed Central journal article supplement (PMC7278547; doi:10.15252/emmm.201911419), 2020-05-07
Supplement: EMMM-12-e11419-s002.pdf [file EMMM-12-e11419-s002.pdf]

## Expanded View Figures

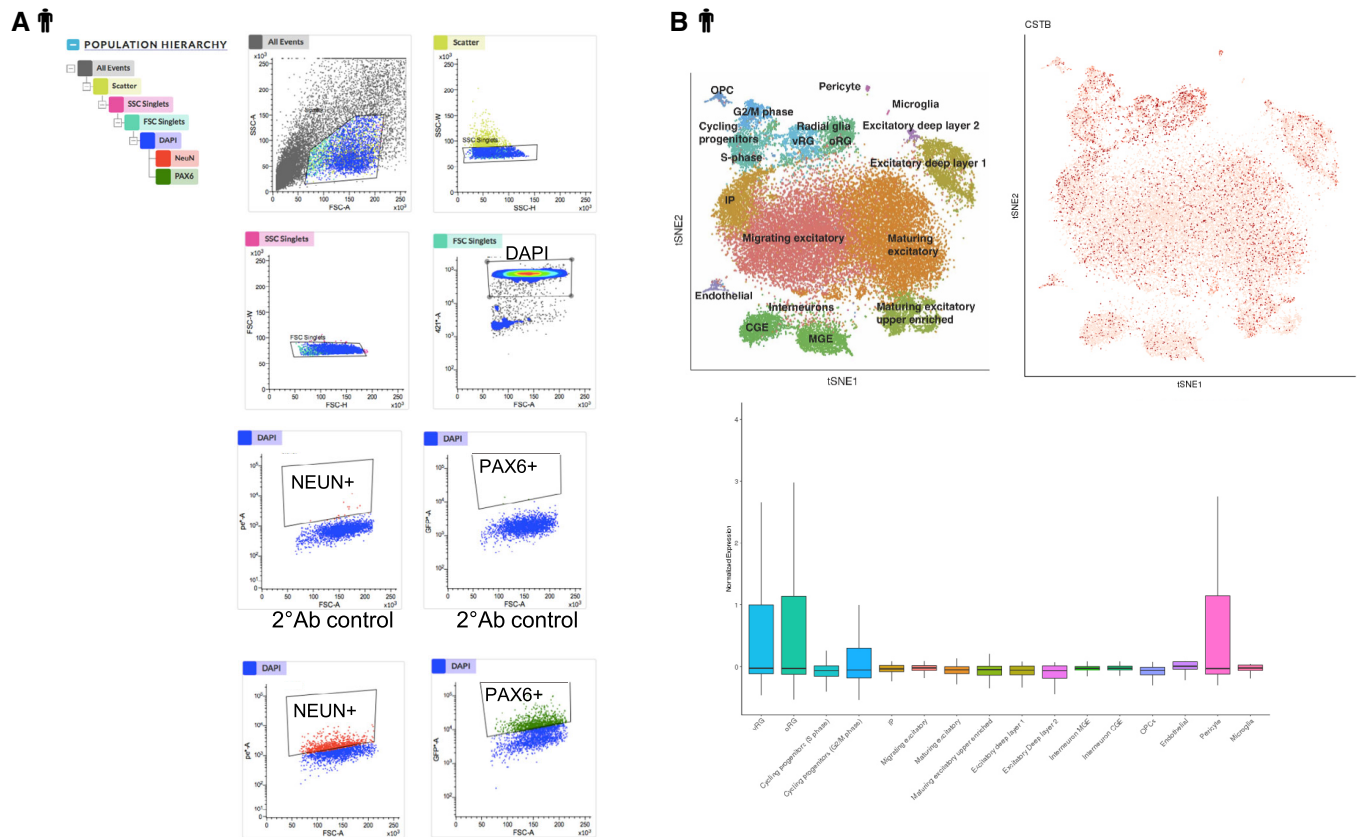

**Figure EV1. CSTB expression during cortical development in hCOs and human tissue.**

A FACS strategy for nuclei sorting from d135 hCOs. NEUN antibody was used to select neuronal nuclei and PAX6 antibody to select progenitor cells. Control plots obtained with secondary antibodies (2° Ab) only are also shown.

B Top: tSNE plots colored by cell types isolated from human embryonic cortical tissues on the left and by *CSTB* gene expression, red, on the right. Bottom: Boxplot of *CSTB* relative expression in each of the cell types isolated from human embryonic cortical tissues (Polioudakis *et al*, 2019).

**Figure EV2. CSTB overexpression induces progenitor cell expansion in hCOs and in the developing mouse cortex.**

- A Quantification of the total number of transfected proliferating  $Ki67^+GFP^+$  cells/area ( $\mu m^2$ ) of ventricle-like structures of d40 hCOs electroporated with GFP-empty vector control or GFP-Cstb and analyzed 5 dpe. Data shown as Z-scores relative to the mean of b-CTRL.
- B, C Quantification of the total number of transfected proliferating  $Ki67^+GFP^+$  cells/area ( $\mu m^2$ ) (B) and  $PH3^+$  cells/area ( $\mu m^2$ ) (C) of ventricular structures of E16 mouse cerebral cortices electroporated at E14 with GFP-empty vector or Cstb and analyzed 2 dpe.
- D Micrograph of coronal sections of E16 mouse cerebral cortices electroporated at E14 with GFP-empty vector or Cstb, analyzed 2 dpe, and immunostained with GFP and Ccnd1. Ventricle (V) is indicated. The dashed lines represent the apical surface of the ventricles.
- E Quantification of the total number of proliferating  $Ccnd1^+$  cells/area ( $\mu m^2$ ) of ventricular structures of E16 mouse cerebral cortices electroporated at E14 with GFP-empty vector or Cstb and analyzed 2 dpe in (D).
- F–H Quantification of the total number of progenitors  $Pax6^+$  cells/area ( $\mu m^2$ ) (F), intermediate progenitors  $Tbr2^+$  cells/area ( $\mu m^2$ ) (G) and  $Pax6^+Tbr2^+$  cells/area ( $\mu m^2$ ) (H) of ventricular structures of E16 mouse cerebral cortices electroporated at E14 with GFP-empty vector or Cstb and analyzed 2 dpe. Data shown as Z-scores relative to the mean of CTRL.
- I, J Distribution of electroporated  $Pax6^+$  cells (I) and progenitor  $GFP^+$  cells (J) in the mouse cortex. The cortex was subdivided into 5 equal bins—Bin1 corresponded to the apical side and Bin5 to the pial side of the cortex and  $GFP^+$  cells or  $Pax6^+$  cells calculated in each Bin.
- K Quantification of the total number of non-transfected proliferating  $PH3^+$  GFP negative cells/area of Bin3 out of the 5 equally distributed 5 bins in E16 mouse cerebral cortices electroporated at E14 with GFP-empty vector or Cstb and analyzed 2 dpe.

Data information: Scale bars: 100  $\mu m$  in (D). Data are represented as mean  $\pm$  SEM. Statistical significance was based on Mann–Whitney test (\* $P < 0.05$ , ns = not significant according to the test). Every dot in the plots refers to independent analyzed ventricles per hCO from at least 3 different hCOs generated in at least 2 independent batches, or independent analyzed mouse brains. Exact  $P$ -values in Appendix Table S1.

Source data are available online for this figure.

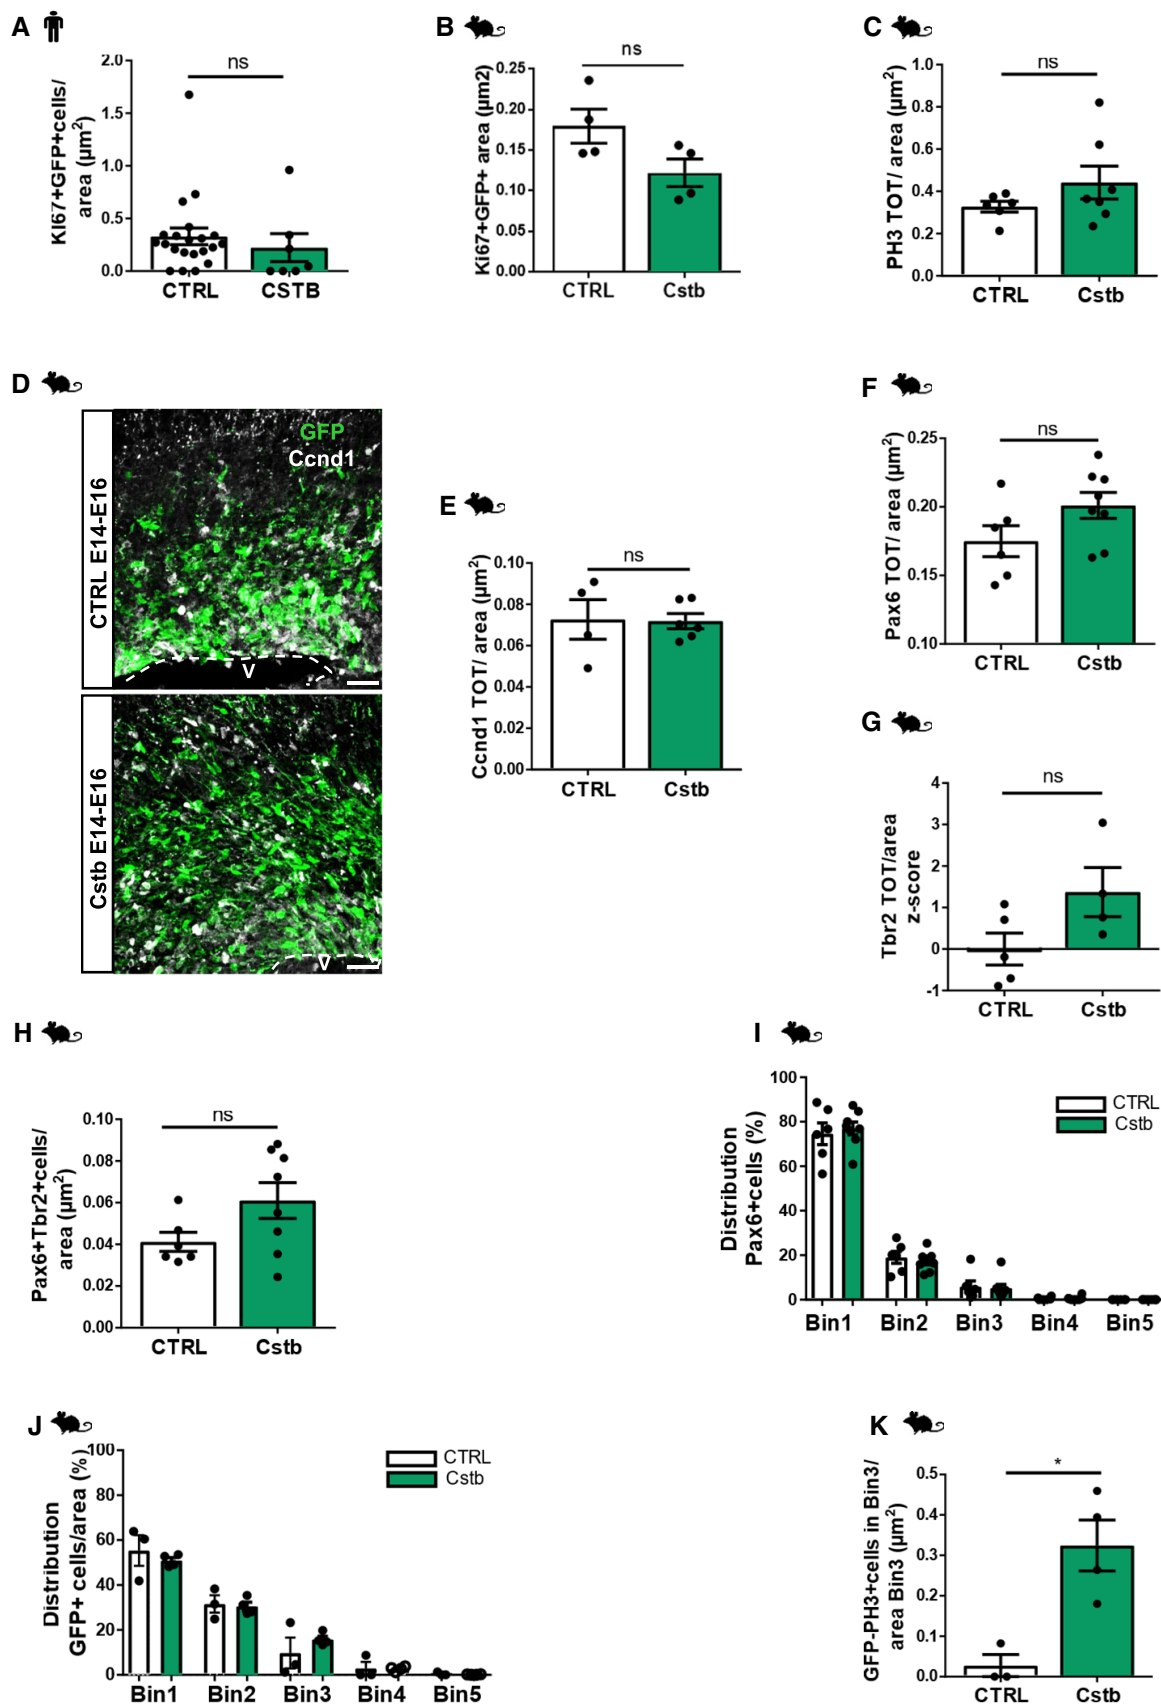

Figure EV2.

**Figure EV3. CSTB is secreted and induces recruitment of migrating interneurons. Downregulation of *Cstb* and R68X overexpression results in a decreased number of progenitors and migrating interneurons in the developing mouse cortex.**

- A Western blot analysis for *Cstb* in the CM from E14 cortical cells in culture for 4 days. The primary cells were transfected with a plasmid expressing GFP alone or GFP-*Cstb*. In the lanes of the CMs derived from cells transfected with GFP as control, only a band is detectable corresponding to the endogenous *Cstb*; in the lanes of the CMs derived from cells transfected with GFP-*Cstb*, one band corresponding to the endogenous *Cstb* and another one corresponding to the exogenous GFP-*Cstb* are detectable.
- B Western blot analysis for GFP in the CM from E14 cortical cells in culture for 2, 4, and 7 days. The primary cells were transfected with a plasmid expressing GFP alone or GFP-*Cstb*. In the lanes of the CMs derived from cells transfected with GFP as control, no band is detectable; in the lanes of the CMs derived from cells transfected with GFP-*Cstb*, one band corresponding to the fused GFP-*Cstb* is detectable.
- C Western blot analysis for *Cstb* in the CM from E14 cortical cells in culture for 4 days. Top lane: CM from cells treated with nocodazole and untreated control cells. Middle lane: CM from cells transfected with control plasmid and *Kif1a*-shRNA. Bottom lane: CM from cells transfected with control plasmid and *Kif5a*-shRNA.
- D Quantification of WB in C.
- E Quantification of the total number of GAD67-GFP interneurons/area ( $\mu\text{m}^2$ ), related to Fig 3F.
- F Quantification of the total number of GAD65-GFP interneurons/area, related to Fig 3D.
- G Detail of micrograph of coronal sections of E17 cerebral cortices, from GAD67-GFP mice, electroporated at E14, co-electroporated with mCherry-expressing vector and HA-empty vector or HA-*Cstb*, and analyzed 3 dpe. Immunostaining with RFP to identify electroporated cells and GFP to identify migrating interneurons in the GAD65-GFP transgenic mouse line.
- H Immunostaining for GFP (Green, to identify miR-transfected cells), *Cstb* (red), and DAPI (blue) on primary E14 mouse cortical cells transfected with miRNA-*Cstb*- or miRneg-expressing plasmids and immunostained 3 dpt and 7 dpt.
- I Quantification of the total number of transfected proliferating Ki67<sup>+</sup> GFP cells/area ( $\mu\text{m}^2$ ) of ventricular structures transfected with GFP-miR-neg vector (CTRL) or GFP-miRNA-*Cstb* (KD).
- J Western blot analysis for *Cstb* in the CM from E14 cortical cells in culture for 4 days. The primary cells were transfected with a plasmid expressing GFP-R68X mutant *Cstb*. Only a band is detectable corresponding to the endogenous *Cstb*; no band corresponding to GFP-R68X is detectable indicating that it is not present in the CM.
- K Western blot analysis for *Cstb* on the protein extracts from E14 primary cortex cells transfected with GFP-*Cstb*- or GFP-R68X-expressing plasmids. *Cstb*<sup>+</sup> bands corresponding to monomeric and dimeric forms are identified.
- L Micrograph of coronal sections of E17 mouse cerebral cortices electroporated at E14 with GFP-*Cstb*, R68X, or miRNA (KD), analyzed 3 dpe, and immunostained with Dcx.
- M Quantification of the total number of ventricles with apically located Dcx<sup>+</sup> cells in (L).

Data information: Nuclei (blue) are stained with DAPI. Scale bars: 50  $\mu\text{m}$  in (G and L), 20  $\mu\text{m}$  in (H). Data are represented as mean  $\pm$  SEM. Statistical significance was based on Mann-Whitney test (\* $P < 0.05$ , \*\* $P < 0.01$ , ns = not significant according to the test) in (D–F) and on exact binomial test (\*\*\* $P < 0.001$ , \*\*\*\* $P < 0.0001$ ) in (I and M). Every dot in the plots refers to independent analyzed mouse brains. Exact  $P$ -values in Appendix Table S1.

Source data are available online for this figure.

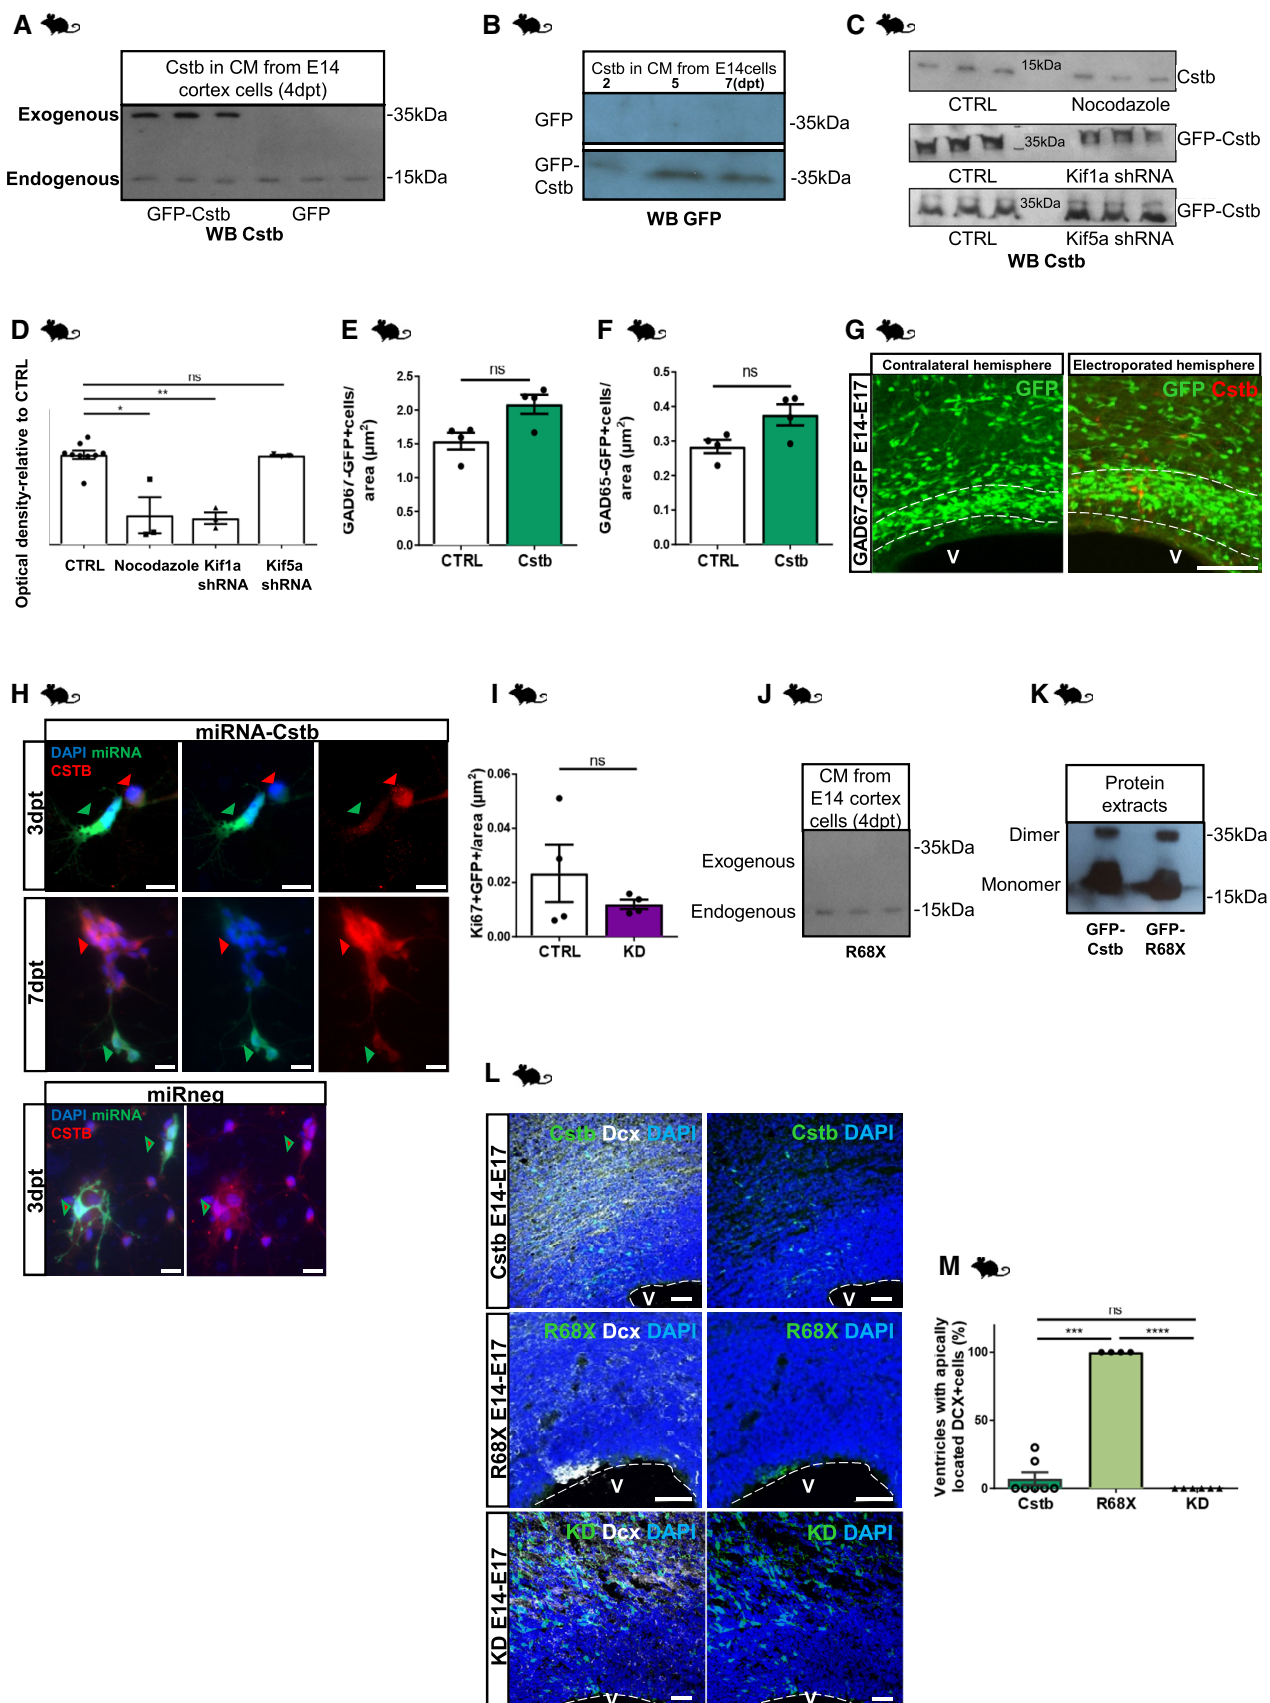

Figure EV3.

**Figure EV4. Proliferation is reduced in EPM1-derived cerebral organoids in a cell-non-autonomous manner.**

- A Scheme of the reprogramming of control and patient-derived PBMCs to generate hCO. Representative pictures of the reprogramming procedure and hCO generation.
- B qRT-PCR results of *CSTB* mRNA expression level in reprogrammed iPSCs from f-CTRL, b-CTRL, UL1, and UL4 PBMCs. Data are represented as mean  $\pm$  SEM. Statistical significance was based on Student's *t*-test (\*\**P* < 0.01). Three samples were analyzed as biological replicates
- C Western blot analysis for *CSTB* in the protein extracts from reprogrammed iPSCs from f-CTRL, b-CTRL, UL1, and UL4 PBMCs. GAPDH immunostaining was used as a positive control. Ponceau Red staining is shown to indicate the presence of proteins at comparable levels in the protein extracts.
- D Micrographs of 2D cultures from d30 and d60 dissociated b-CTRL, UL1, and UL4 hCOs. Cells were immunostained for KI67.
- E, F Quantification of the number of KI67<sup>+</sup> cells related to the number of DAPI<sup>+</sup> cells in 2D cultures derived from dissociation of d30 (E) and d60 (F). Data are shown as a Z-score of b-CTRL and they are represented as mean  $\pm$  SEM. Statistical significance was based on Mann-Whitney test (\*\**P* < 0.01, \*\*\**P* < 0.001).
- G, H FACS plots of the KI67<sup>+</sup> (G) and PH3<sup>+</sup> (H) cells by FACS analysis on 36 days old dissociated hCOs.
- I Quantification of the PH3<sup>+</sup> cells by FACS analysis on 36 days old dissociated hCOs after exchange of conditioned medium between b-CTRL and UL4 hCOs. Data are represented as mean  $\pm$  SEM. Statistical significance was based on Mann-Whitney test Statistical significance was based on Mann-Whitney test (\**P* < 0.05, \*\**P* < 0.01) Four samples were analyzed as biological replicates FACS plots in Fig EV4H.

Data information: Scale bars: 200  $\mu$ m in (A) and 50  $\mu$ m in (D). Every dot in the plots refers to the number of quantified independent wells of plated cells derived from a pool of 2 or 3 independent organoids. Exact *P*-values in Appendix Table S1.

Source data are available online for this figure.



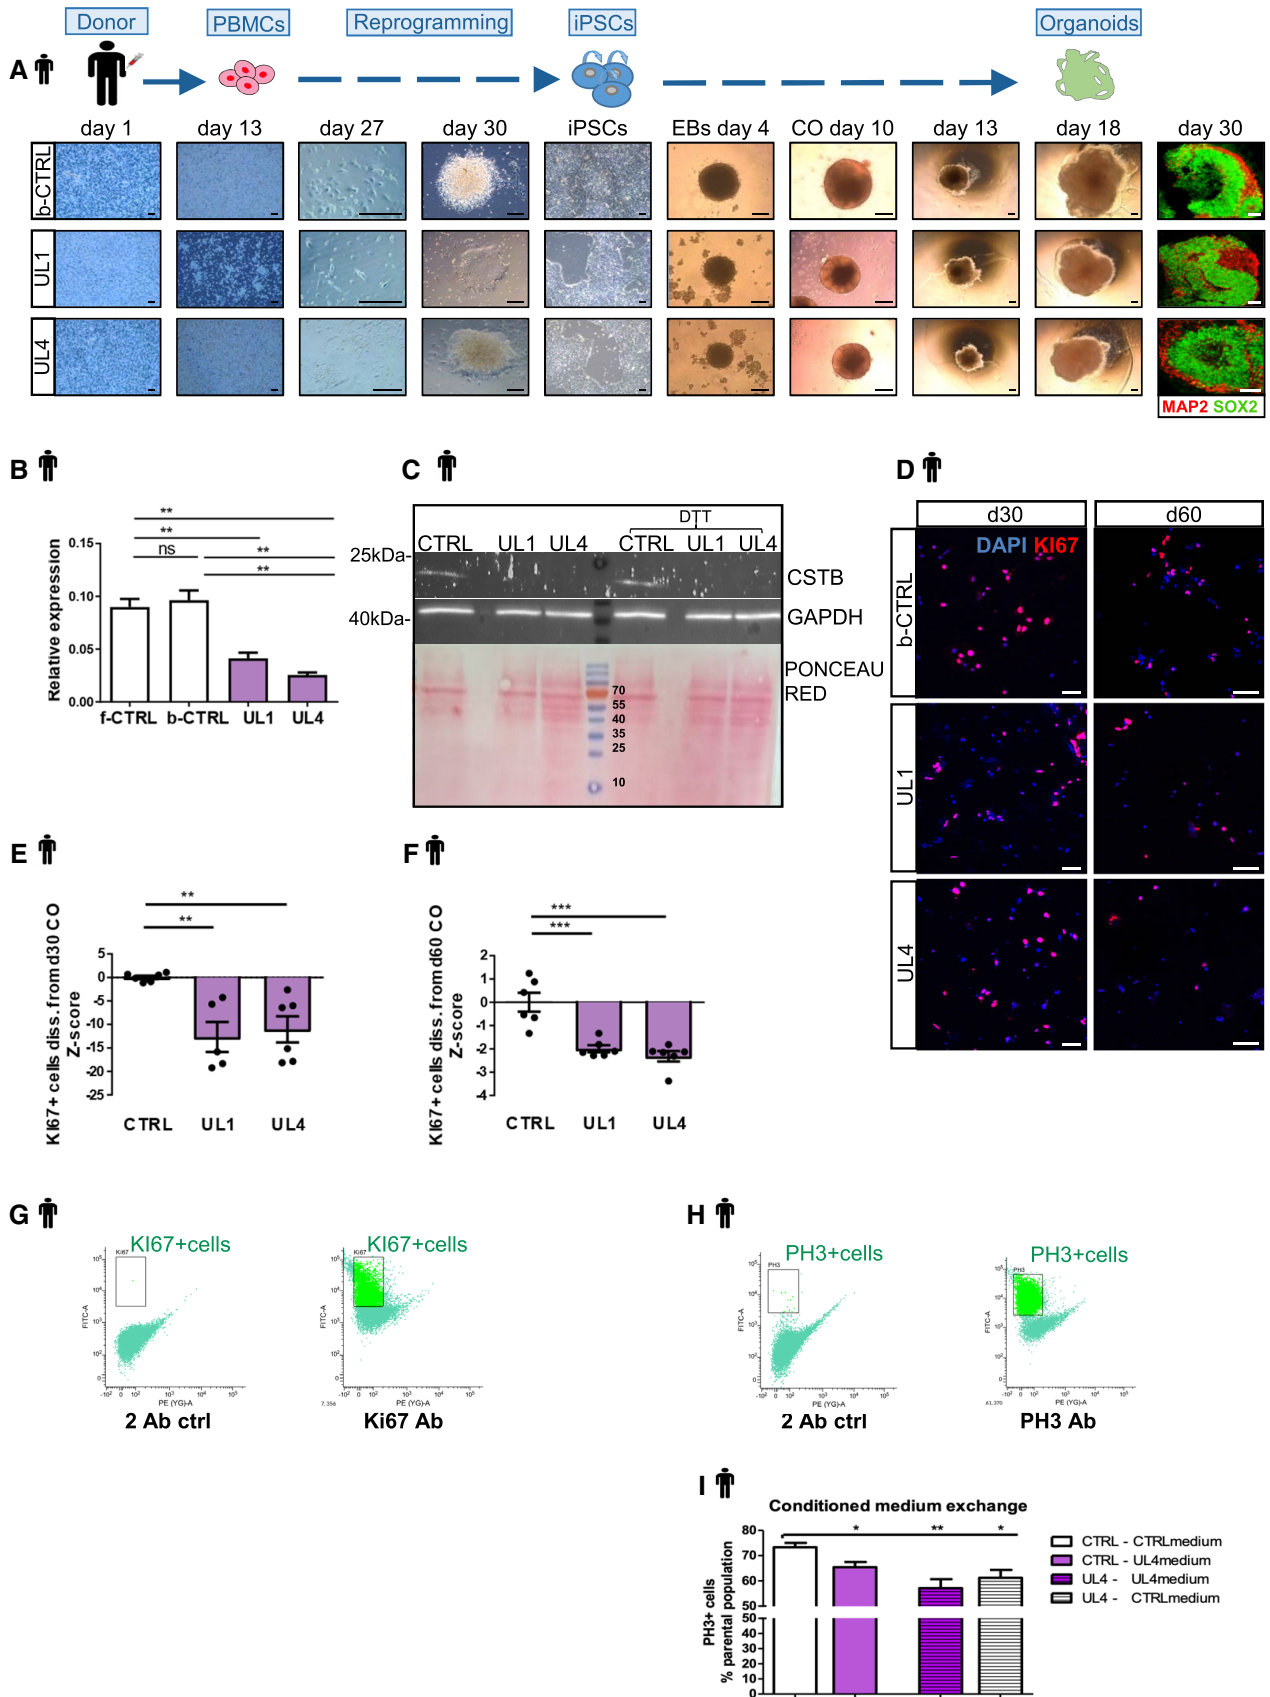

Figure EV4.

**Figure EV5. EPM1-derived cerebral organoids exhibit premature differentiation. Proteomic analysis in patients' hCOs.**

- A FACS plots of DCX<sup>+</sup> cells sorted from dissociated d60 hCOs (related to Fig 6E).
- B Micrographs of 2D cultures from d30 and d60 dissociated b-CTRL, UL1, and UL4 hCOs. Cells were immunostained for TUBB3.
- C, D Quantification of the number of TUBB3<sup>+</sup> cells related to the number of DAPI<sup>+</sup> cells in 2D cultures derived from dissociation of d30 (C) and d60 (D).
- E Western blot analysis of differentially expressed proteins identified by Mass Spectrometry analysis on b-CTRL and UL1 hCOs. Different proteins have been quantified on protein extracts from hCOs from both patient's lines UL1 and UL4 and from b-CTRL samples. Quantifications from three independent samples for CTRL and UL4 and four independent samples for UL1 are shown in the plot as average value  $\pm$  SEM. Fold changes from proteomic analysis for each protein are reported below the plot.
- F The 178 differentially expressed proteins were cross-referenced with the dataset of single-cell RNA-seq from human brain fetal cortex (<http://solo.bmap.ucla.edu/shiny/webapp/>; Polioudakis *et al*, 2019) to understand which cells express the regulated proteins. They were then categorized according to their cell expression in 4 groups.
- G GOChord plot showing relationships between selected representative biological process GO terms and differentially expressed proteins mainly expressed in radial glial cells. The representation shows up (red)- and downregulated (green) proteins differentially expressed in UL1 relative to b-CTRL ( $-0.3 \geq \log_2FC \geq 0.3$ ).

Data information: Data are shown as a Z-score of b-CTRL, and they are represented as mean  $\pm$  SEM. Statistical significance was based on Mann-Whitney test (\*\* $P < 0.01$ ). Scale bars: 50  $\mu$ m in (B). Every dot in the plots refers to the number of quantified independent wells of plated cells derived from a pool of 2 or 3 independent organoids. Exact  $P$ -values in Appendix Table S1.

Source data are available online for this figure.



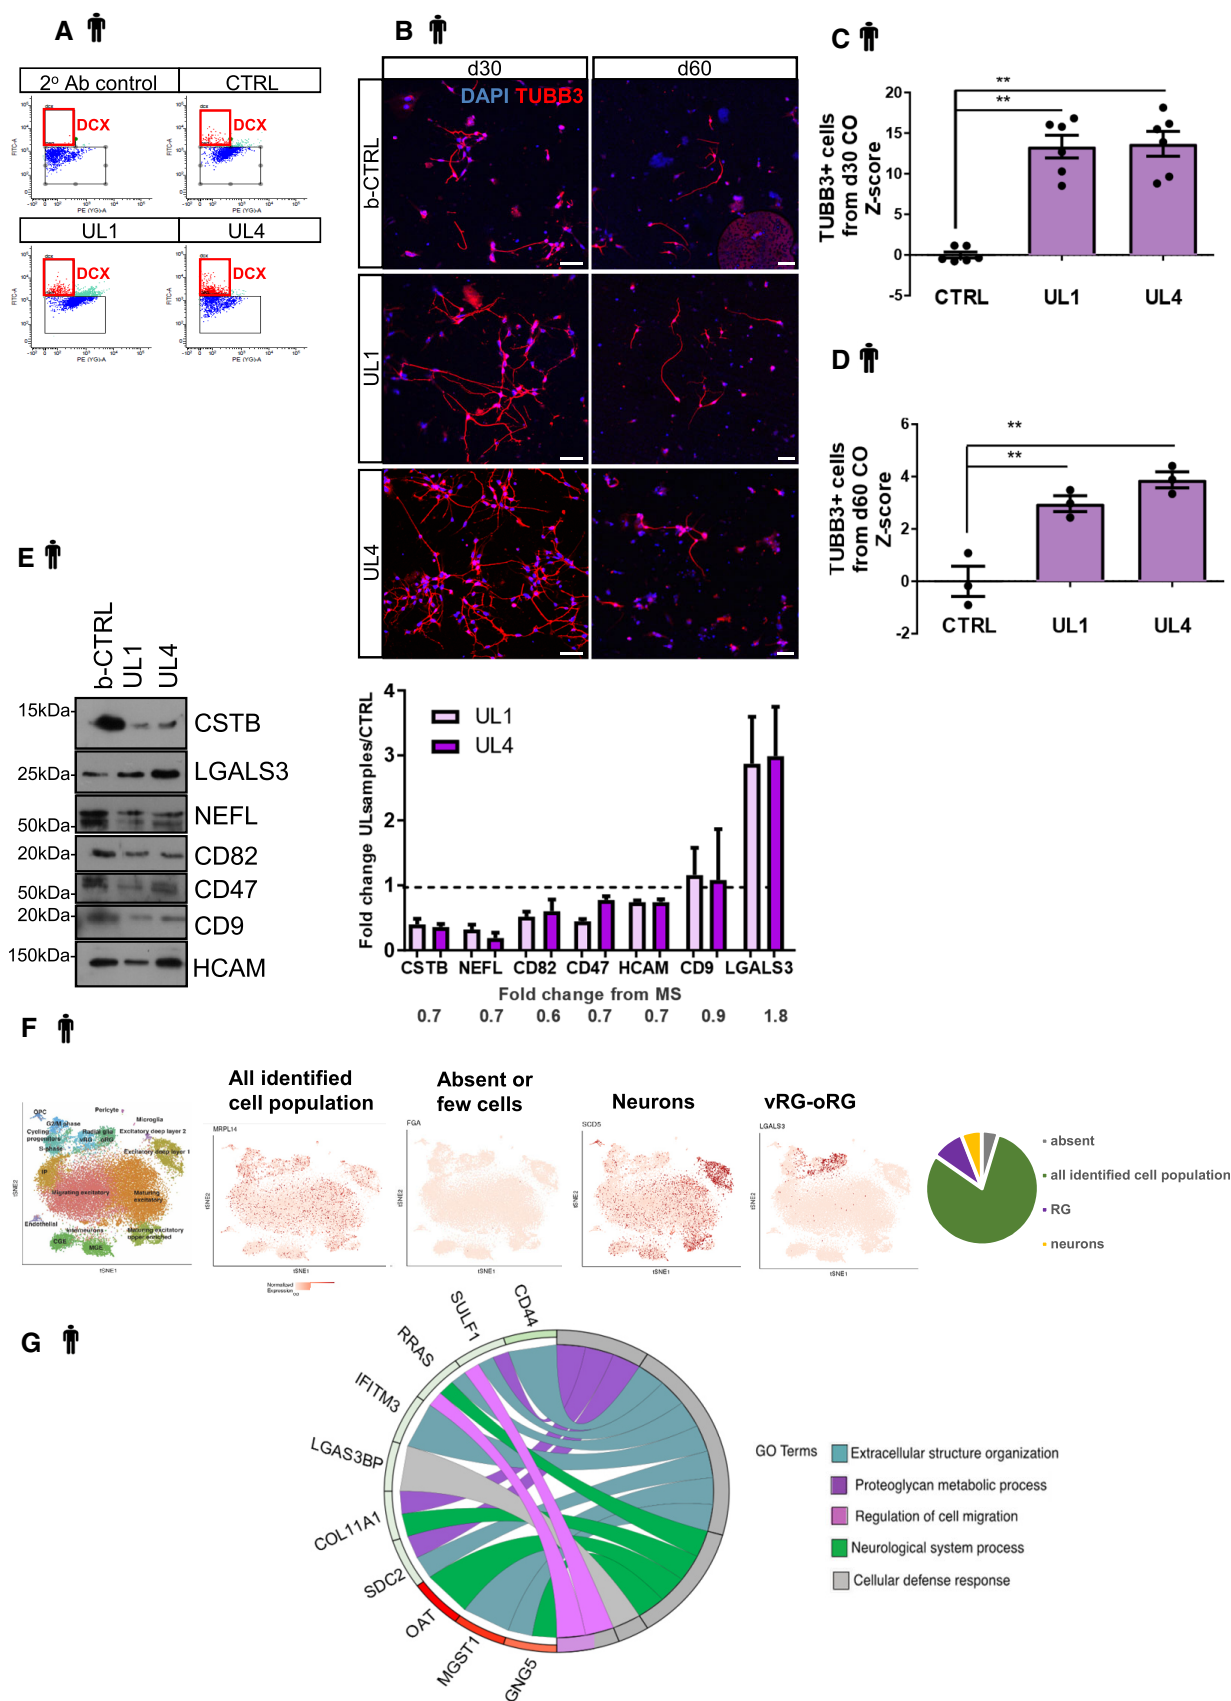

Figure EV5.
