# Supplementary material for: Cystatin B is essential for proliferation and interneuron migration in individuals with EPM1 epilepsy
Source: PubMed Central journal article supplement (PMC7278547; doi:10.15252/emmm.201911419), 2020-05-07

Figure2

Figure2A

GFP KI67

CTRL

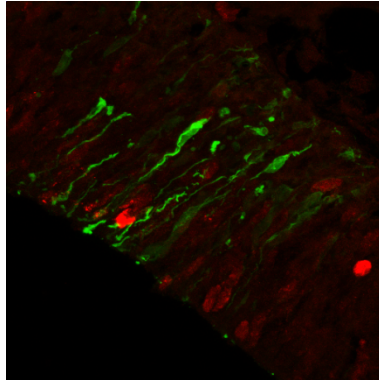

CSTB

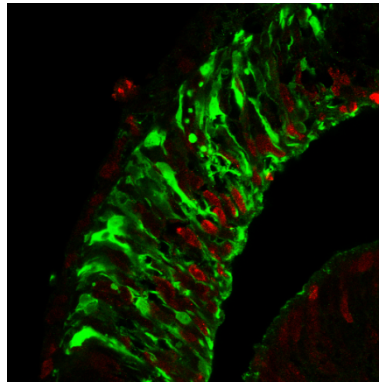

Supplement: EMMM-12-e11419-s006.pdf [file EMMM-12-e11419-s006.pdf]
