# Supplementary material for: Cystatin B is essential for proliferation and interneuron migration in individuals with EPM1 epilepsy
Source: PubMed Central journal article supplement (PMC7278547; doi:10.15252/emmm.201911419), 2020-05-07
Supplement: EMMM-12-e11419-s007.pdf [file EMMM-12-e11419-s007.pdf]

Figure 3

Figure 3A

CSF E14

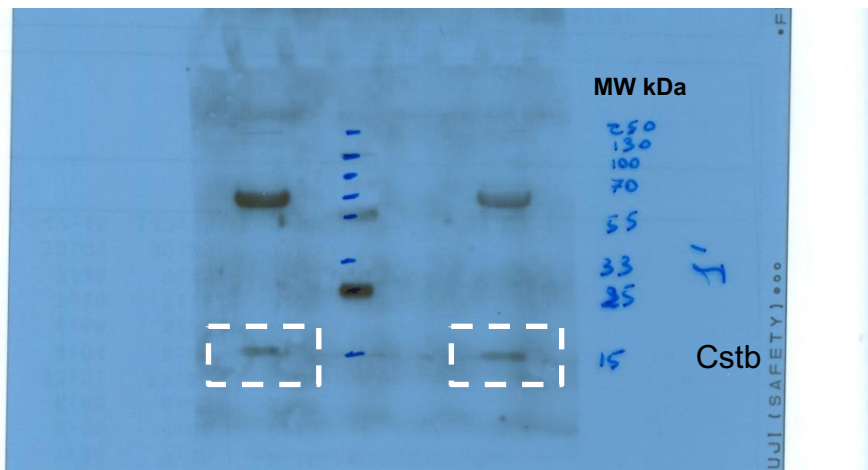

Figure 3B

Cstb in CM from E14 cortex cells

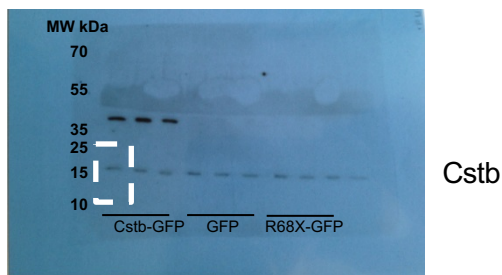

Figure 3C

Cystatin B

GAPDH

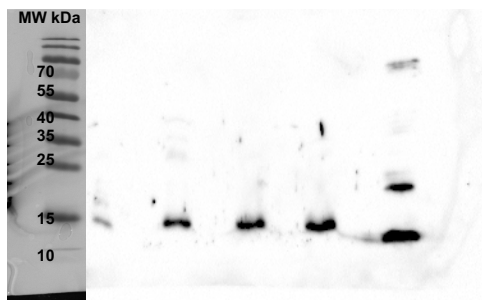

19 38 60 80 days PE

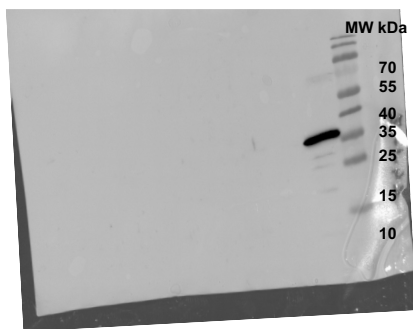

19 38 60 80 days PE

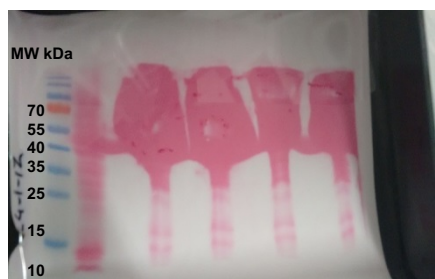

Ponceau Red
