# Supplementary material for: Cystatin B is essential for proliferation and interneuron migration in individuals with EPM1 epilepsy
Source: PubMed Central journal article supplement (PMC7278547; doi:10.15252/emmm.201911419), 2020-05-07

Figure 4

Figure 4C

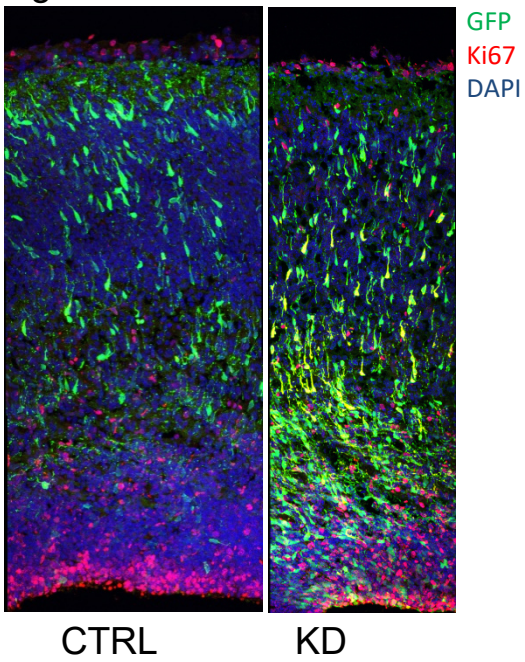

Figure 4H

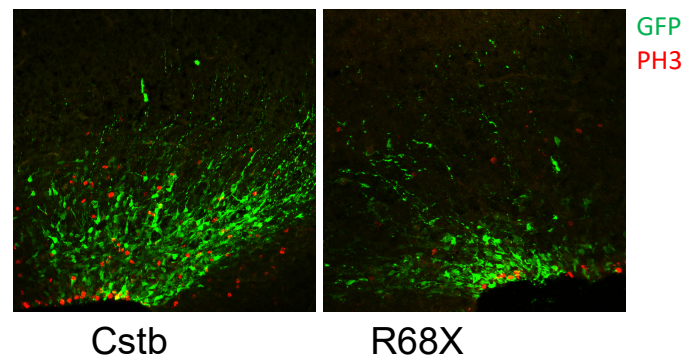

Figure 4L

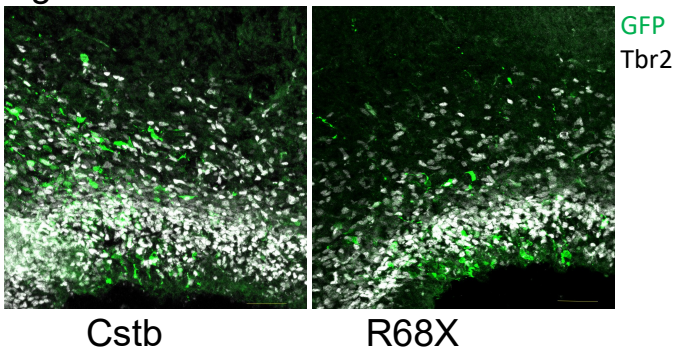

Figure 4N

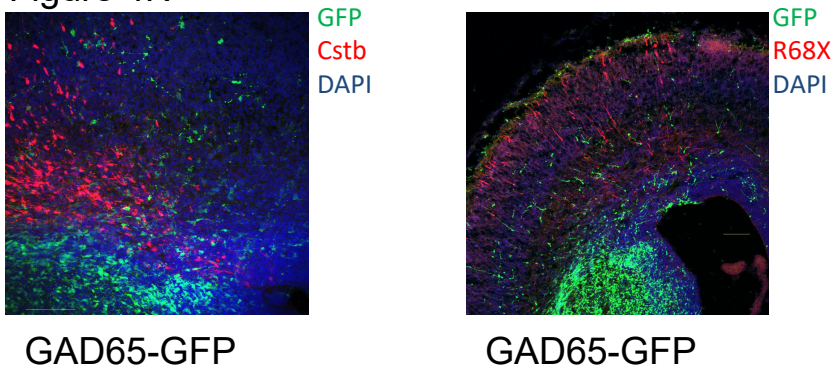

Supplement: EMMM-12-e11419-s008.pdf [file EMMM-12-e11419-s008.pdf]
