# Supplementary material for: Cystatin B is essential for proliferation and interneuron migration in individuals with EPM1 epilepsy
Source: PubMed Central journal article supplement (PMC7278547; doi:10.15252/emmm.201911419), 2020-05-07

Figure 6

Figure 6A

DAPI DCX

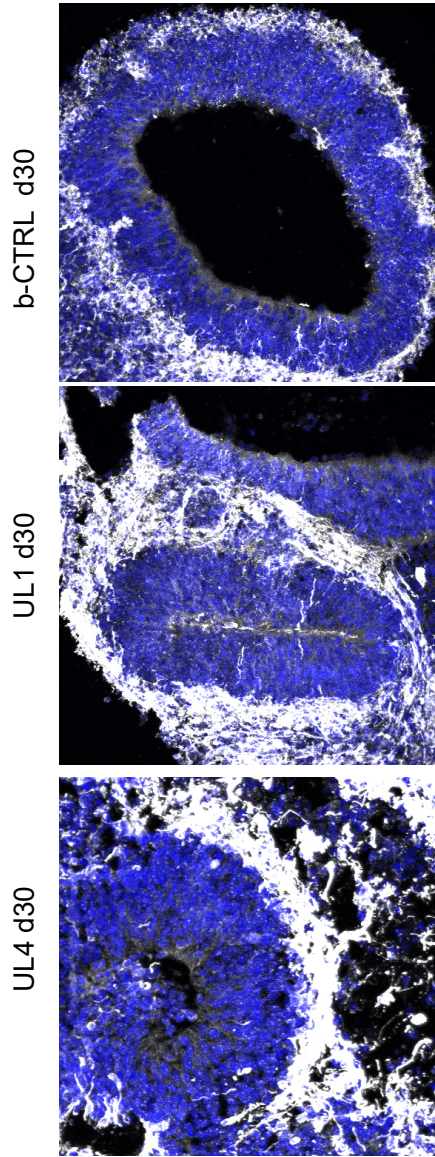

Figure 6C

DAPI DCX

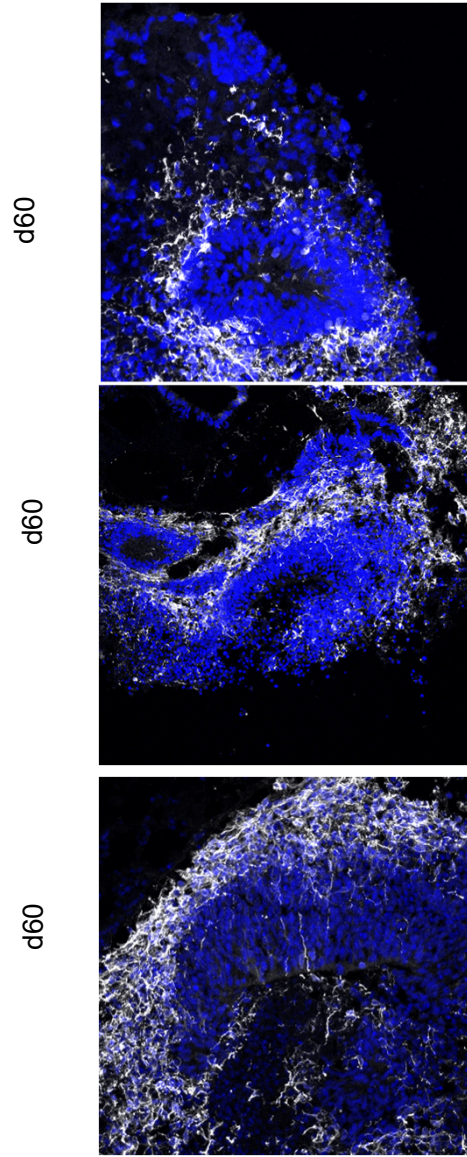

Figure 6G

F-CTRL dorsal

UL1 dorsal

F-CTRL GFP ventral

F-CTRL GFP ventral

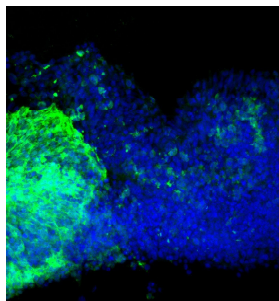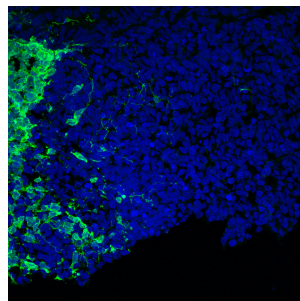

Supplement: EMMM-12-e11419-s010.pdf [file EMMM-12-e11419-s010.pdf]
